# Supplementary material for: Cellulose dissolution and regeneration using a non-aqueous, non-stoichiometric protic ionic liquid system
Source: Springer Nature journal article supplement (doi:10.1007/s10570-020-03444-8), 2020-09-12

Supplementary information: Cellulose dissolution and regeneration using a non-aqueous, non-stoichiometric protic ionic liquid system

Viscosity data, binary mixtures of 1,1,3,3-tetramethylguanidine and Propionic acid

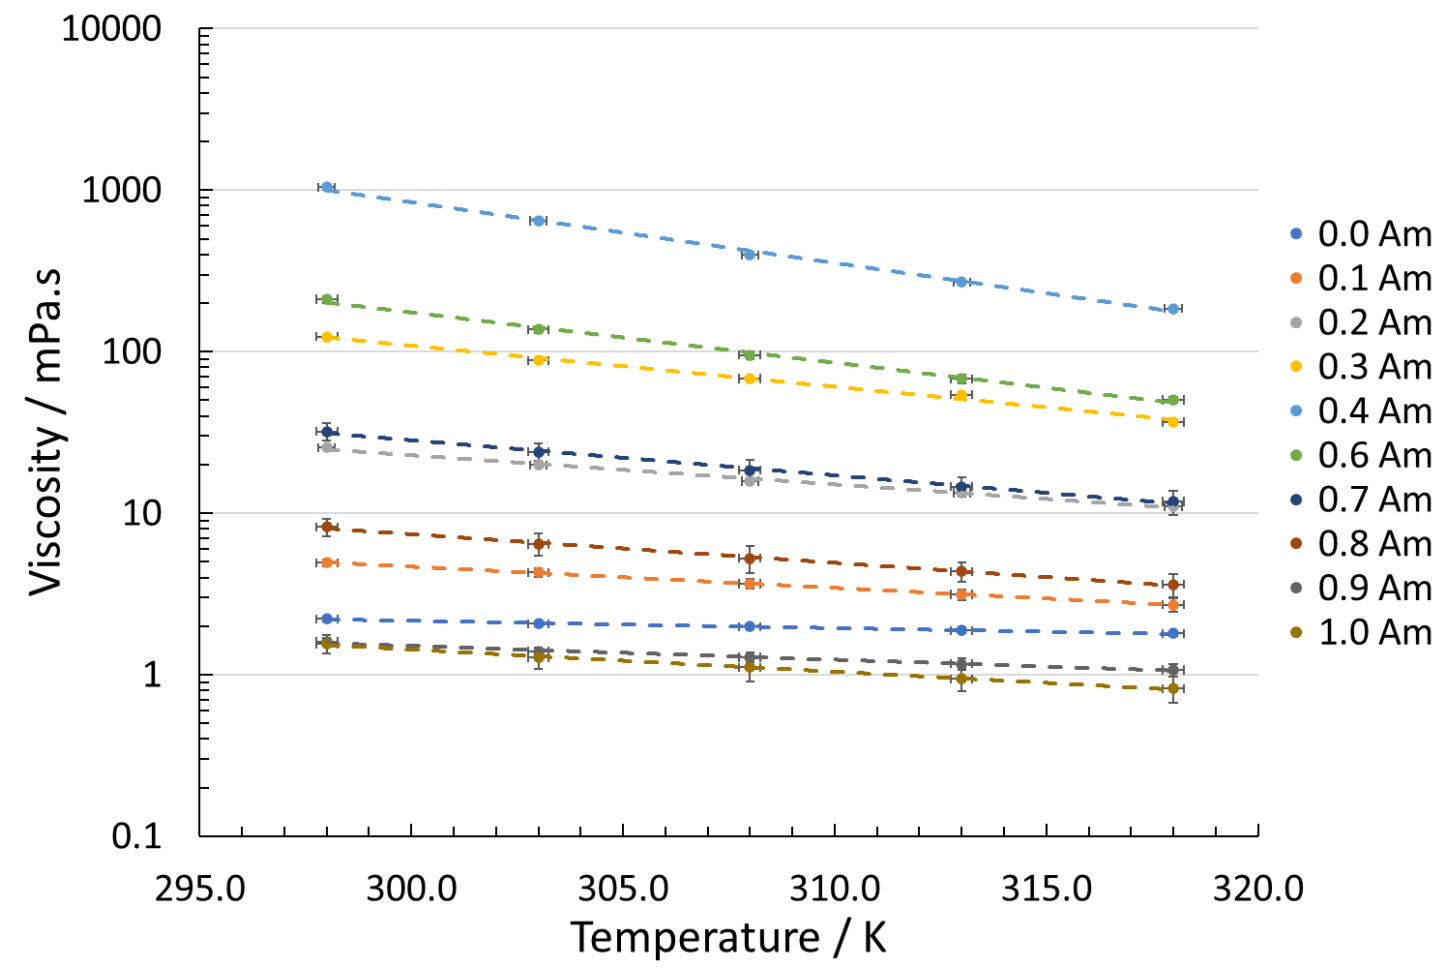

NMR Analysis of solvent mixtures subjected to 100°C heating for two hours (cellulose dissolution conditions)

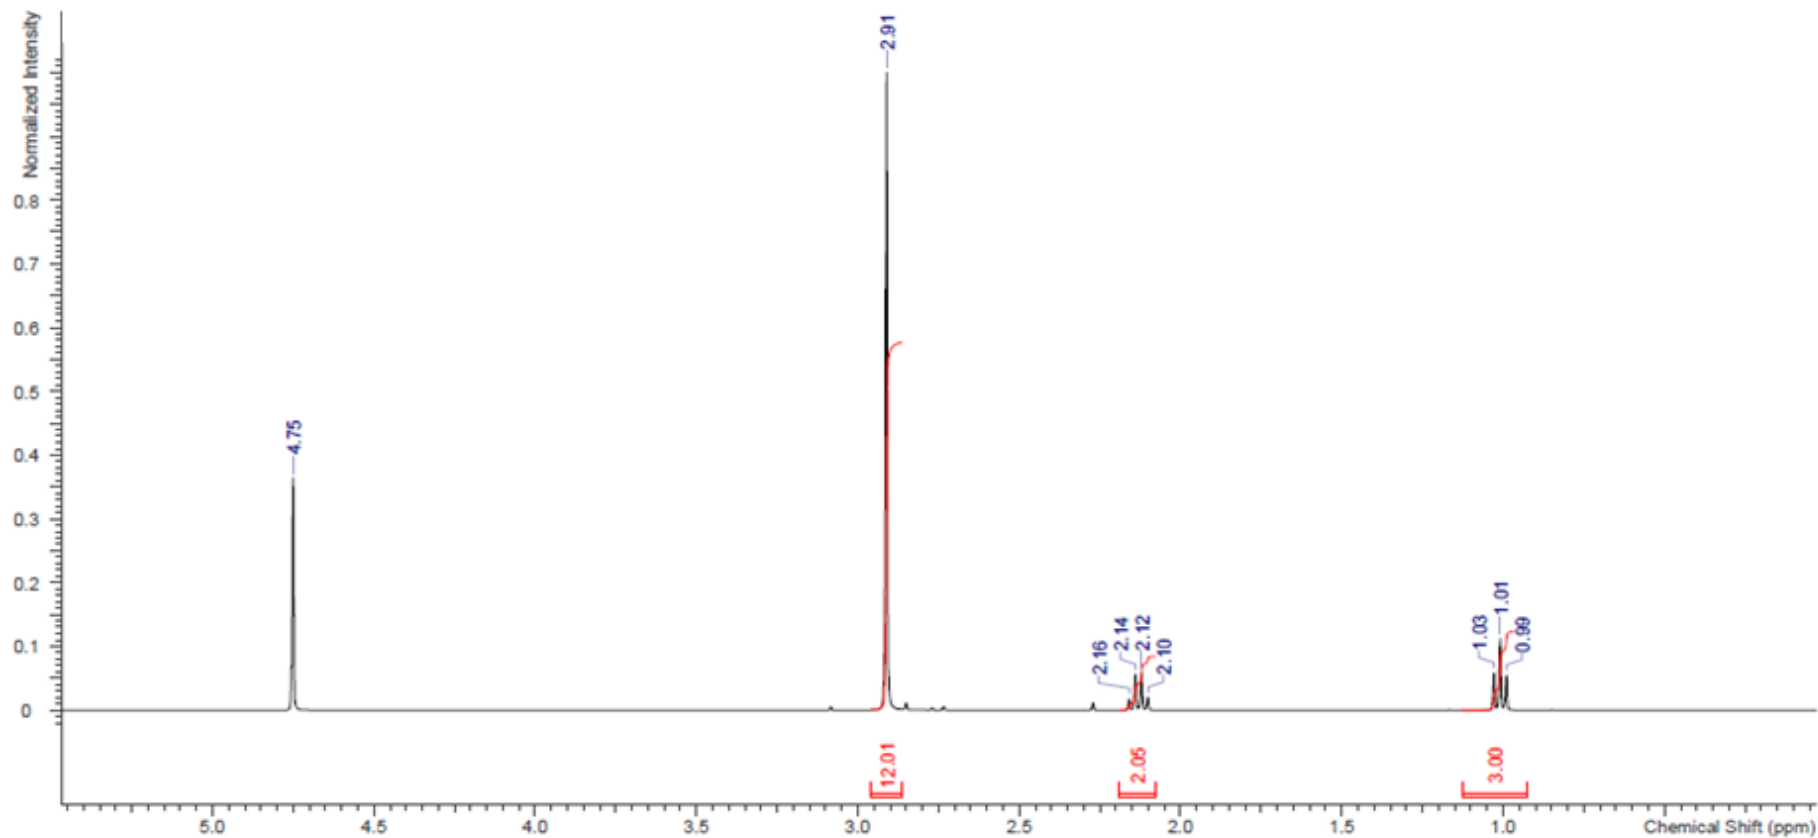

Figure S1: 50% TMG, before heating

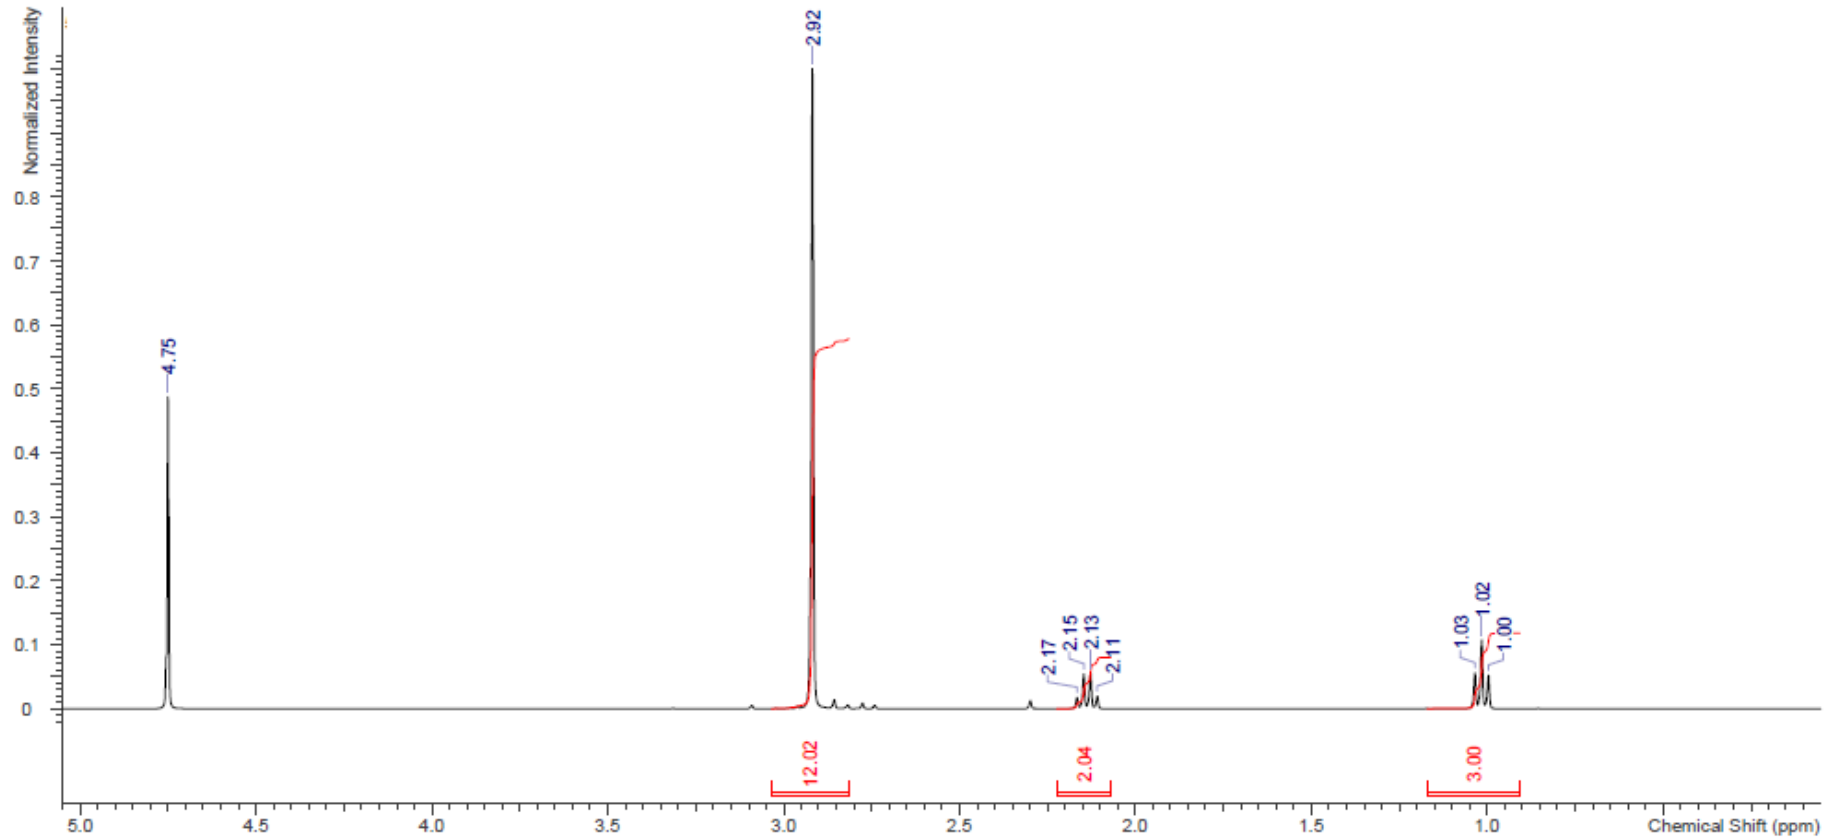

Figure S2: 50% TMG, after heating

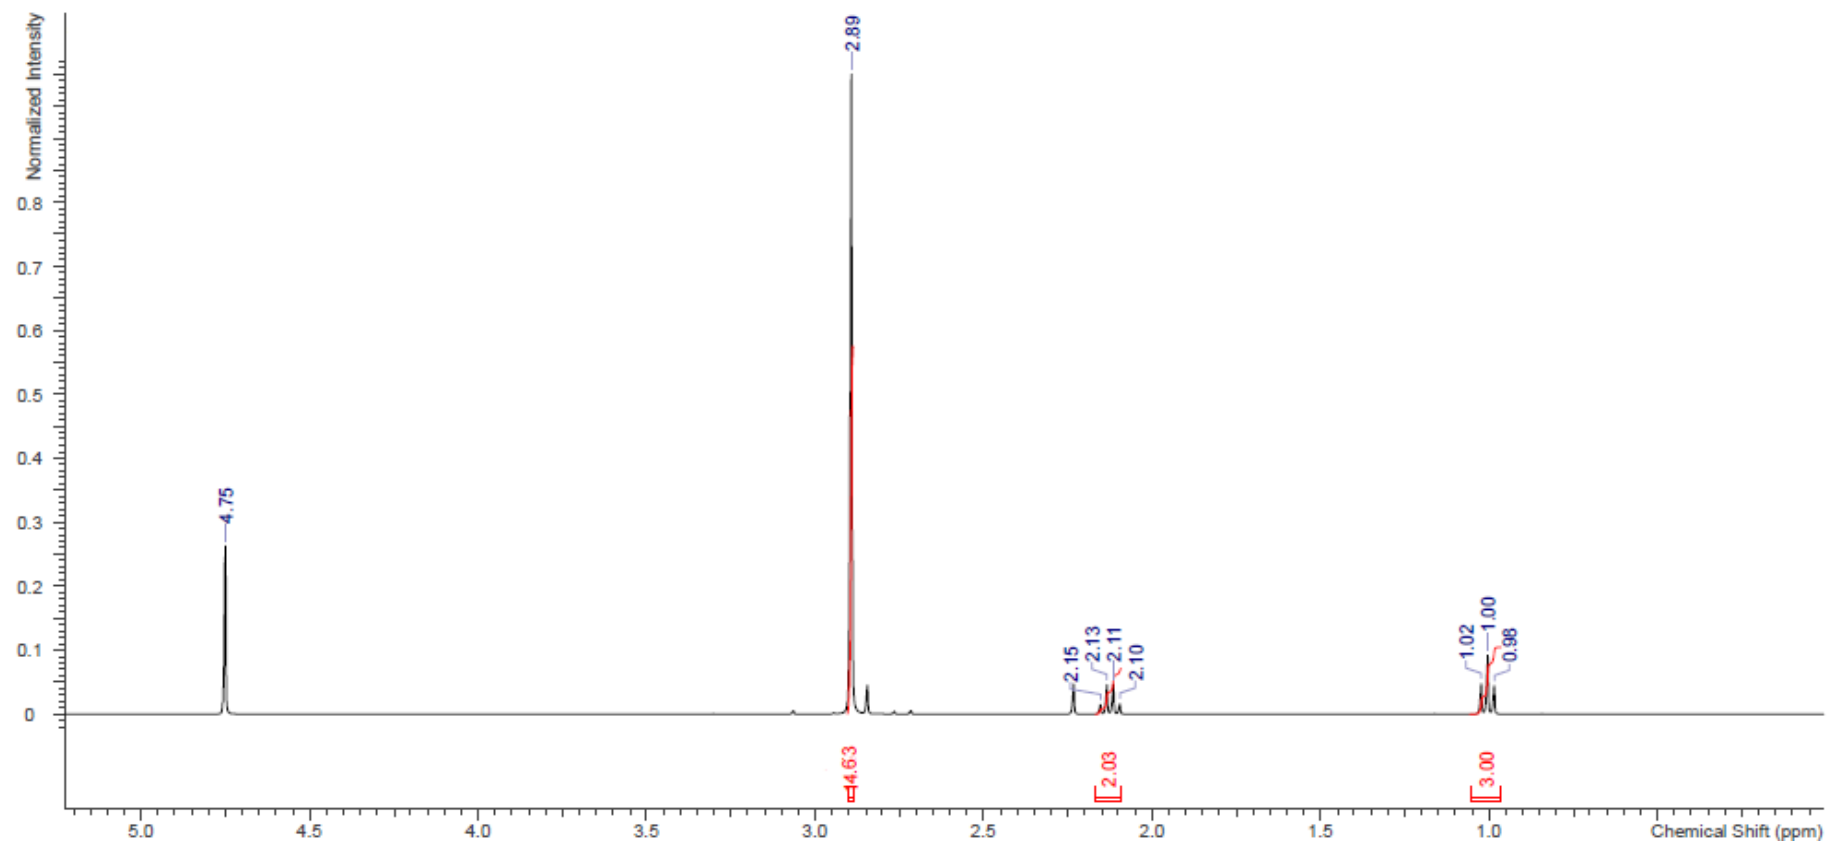

Fig S3: 55%, before heating

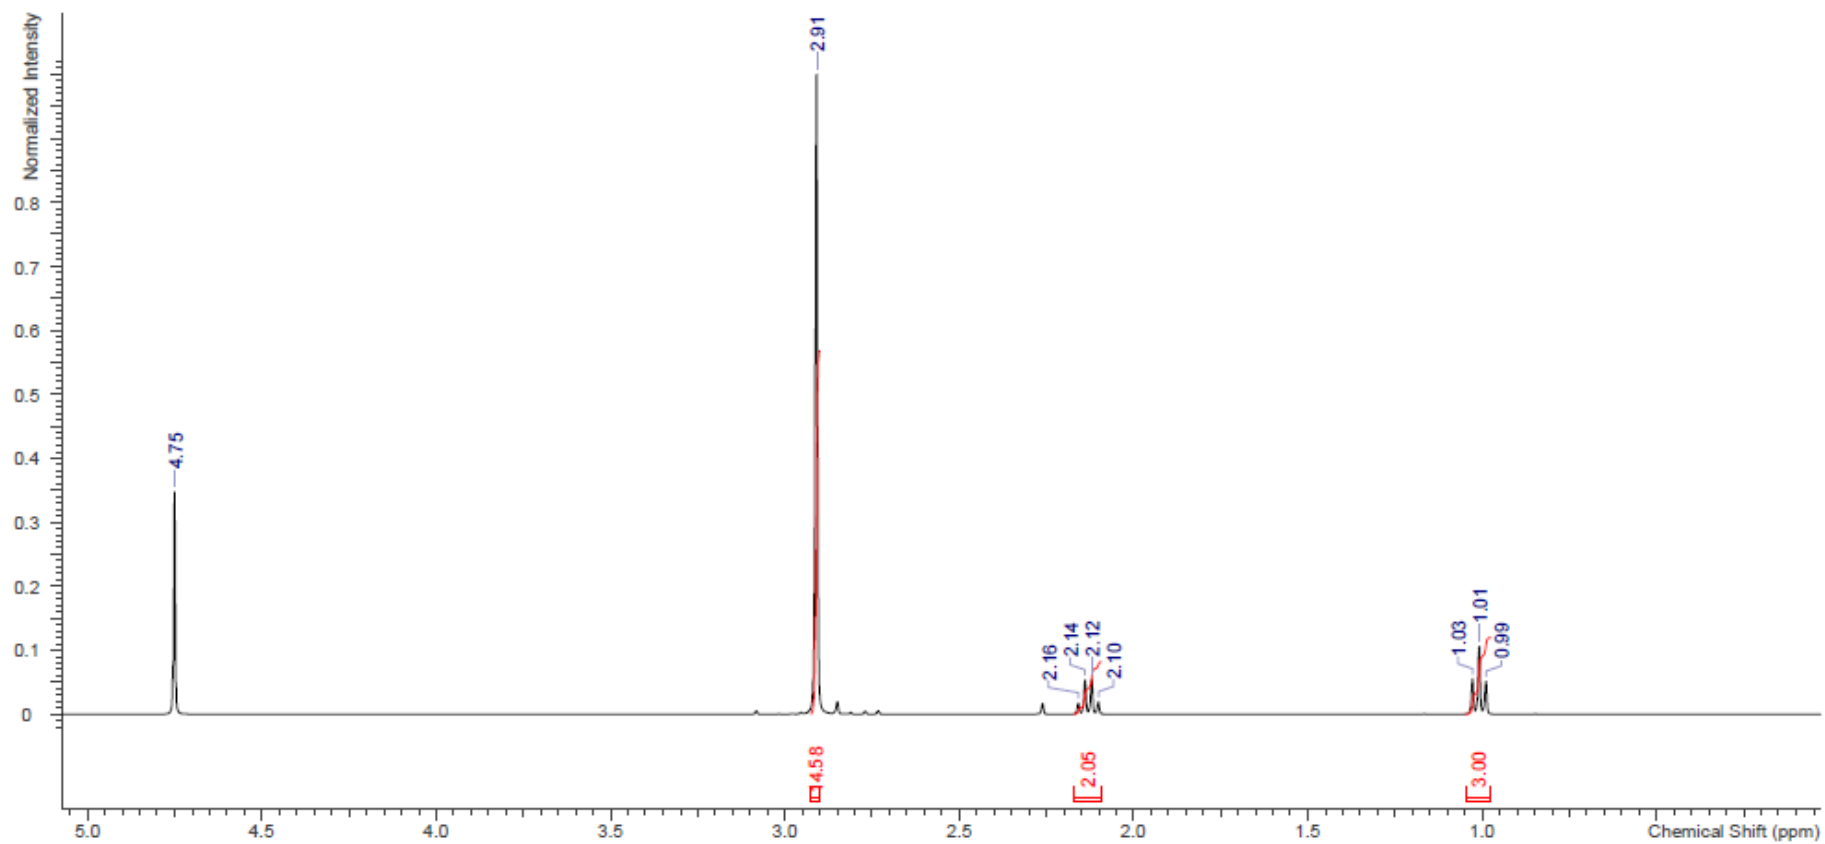

Fig S4: 55%, after heating

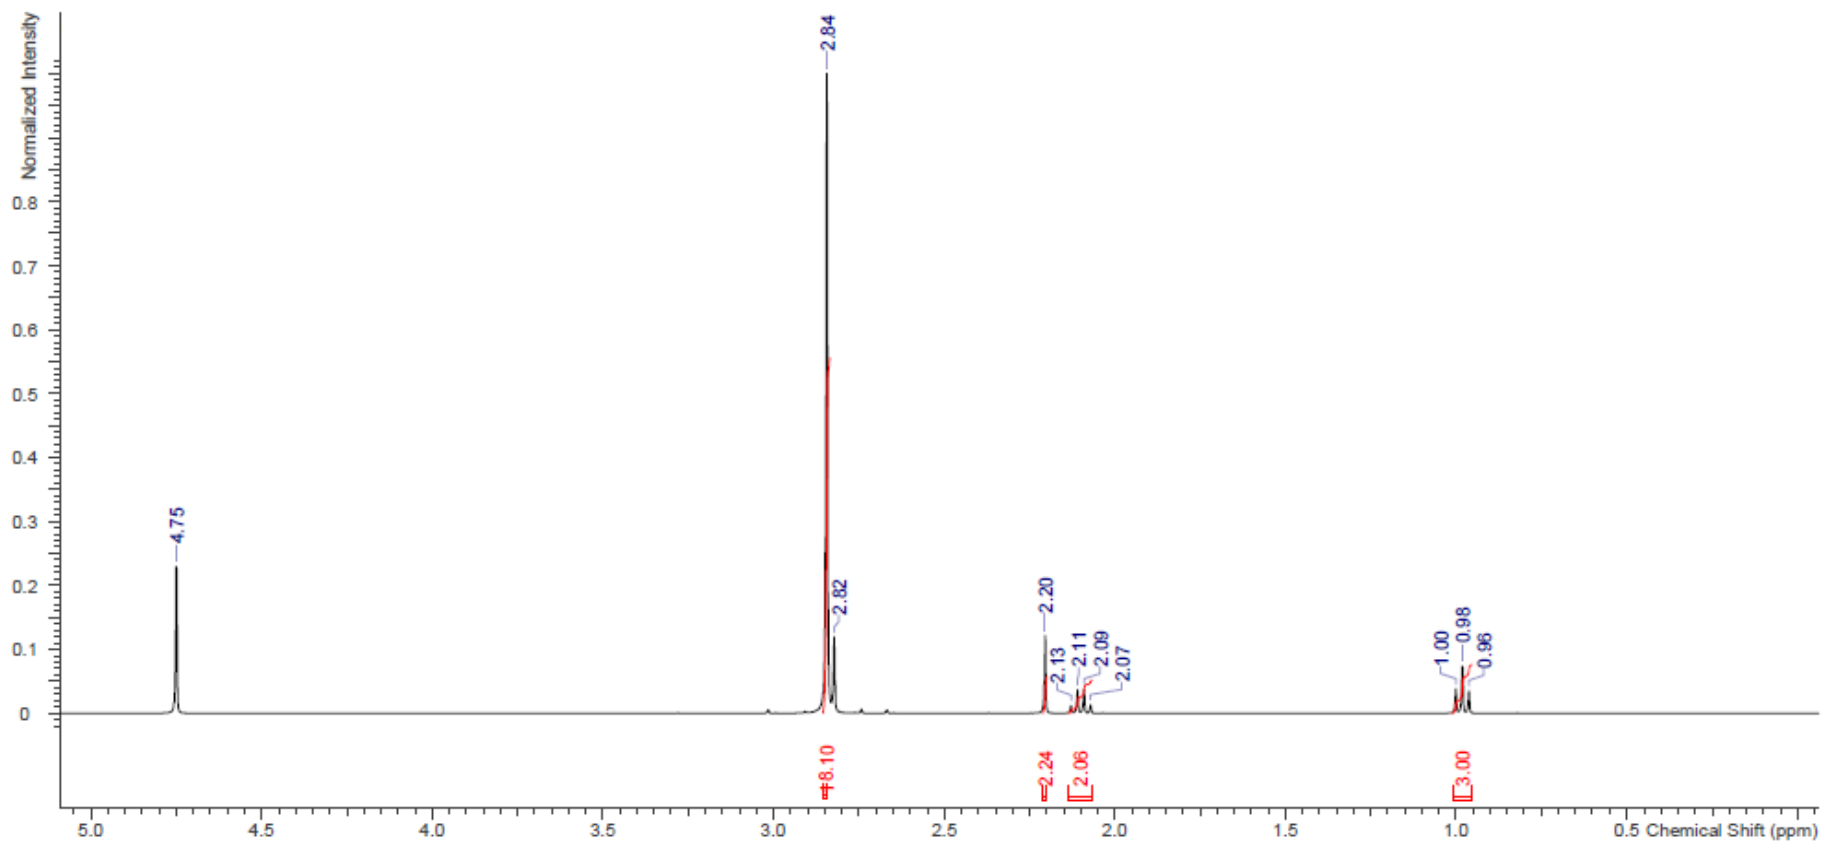

Fig S5: 60% TMG, before heating

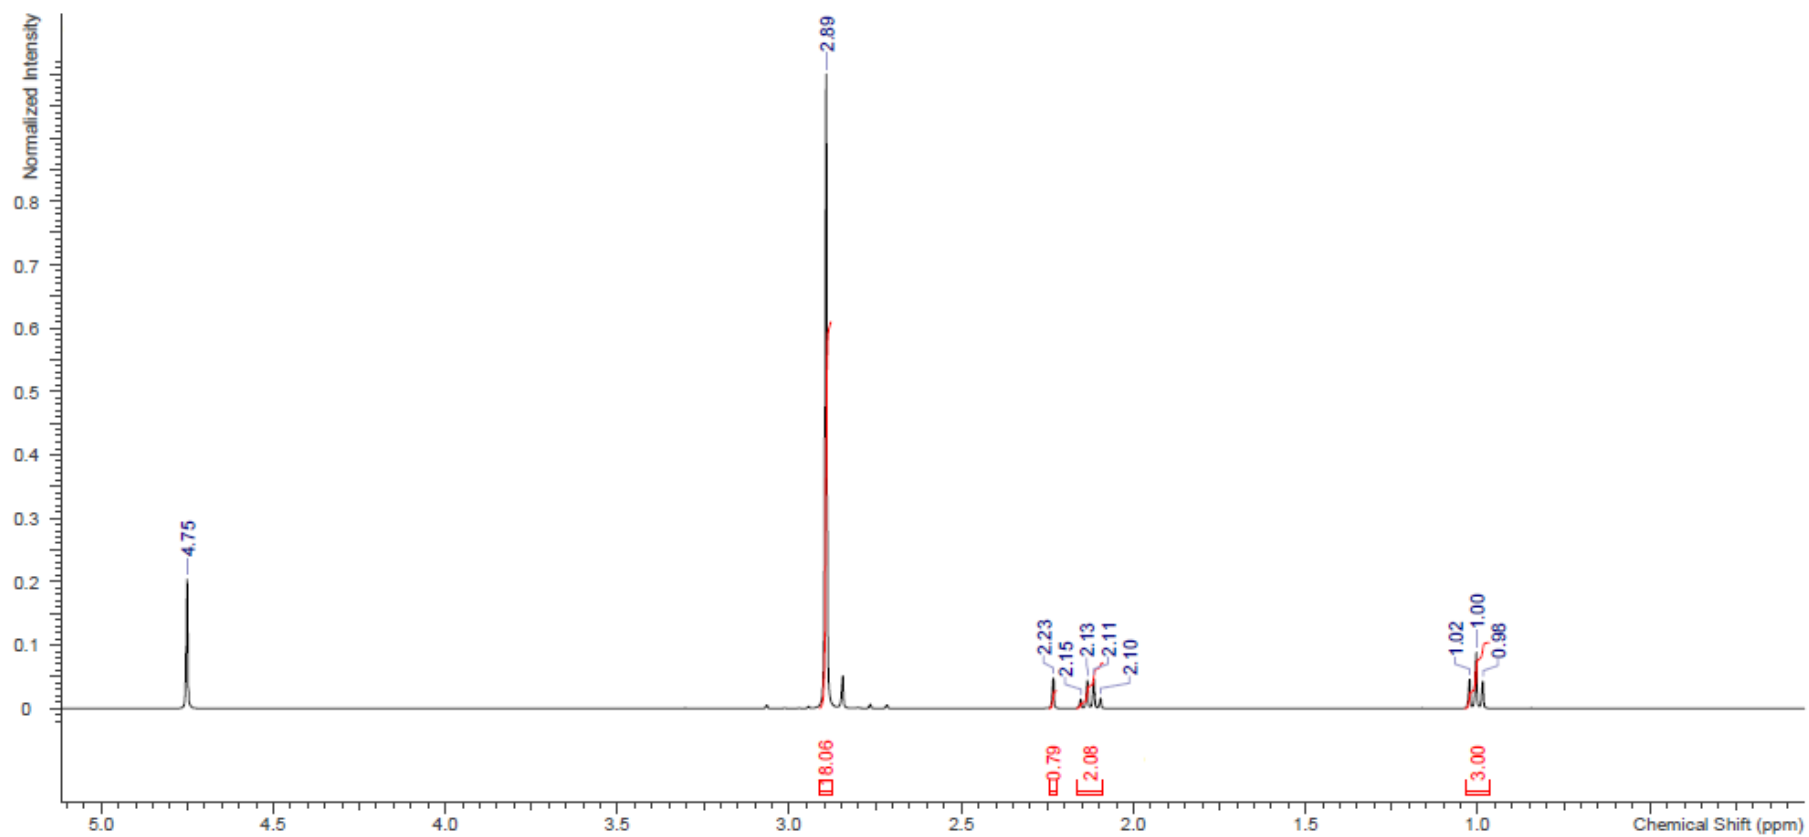

Fig S6: 60% TMG, after heating

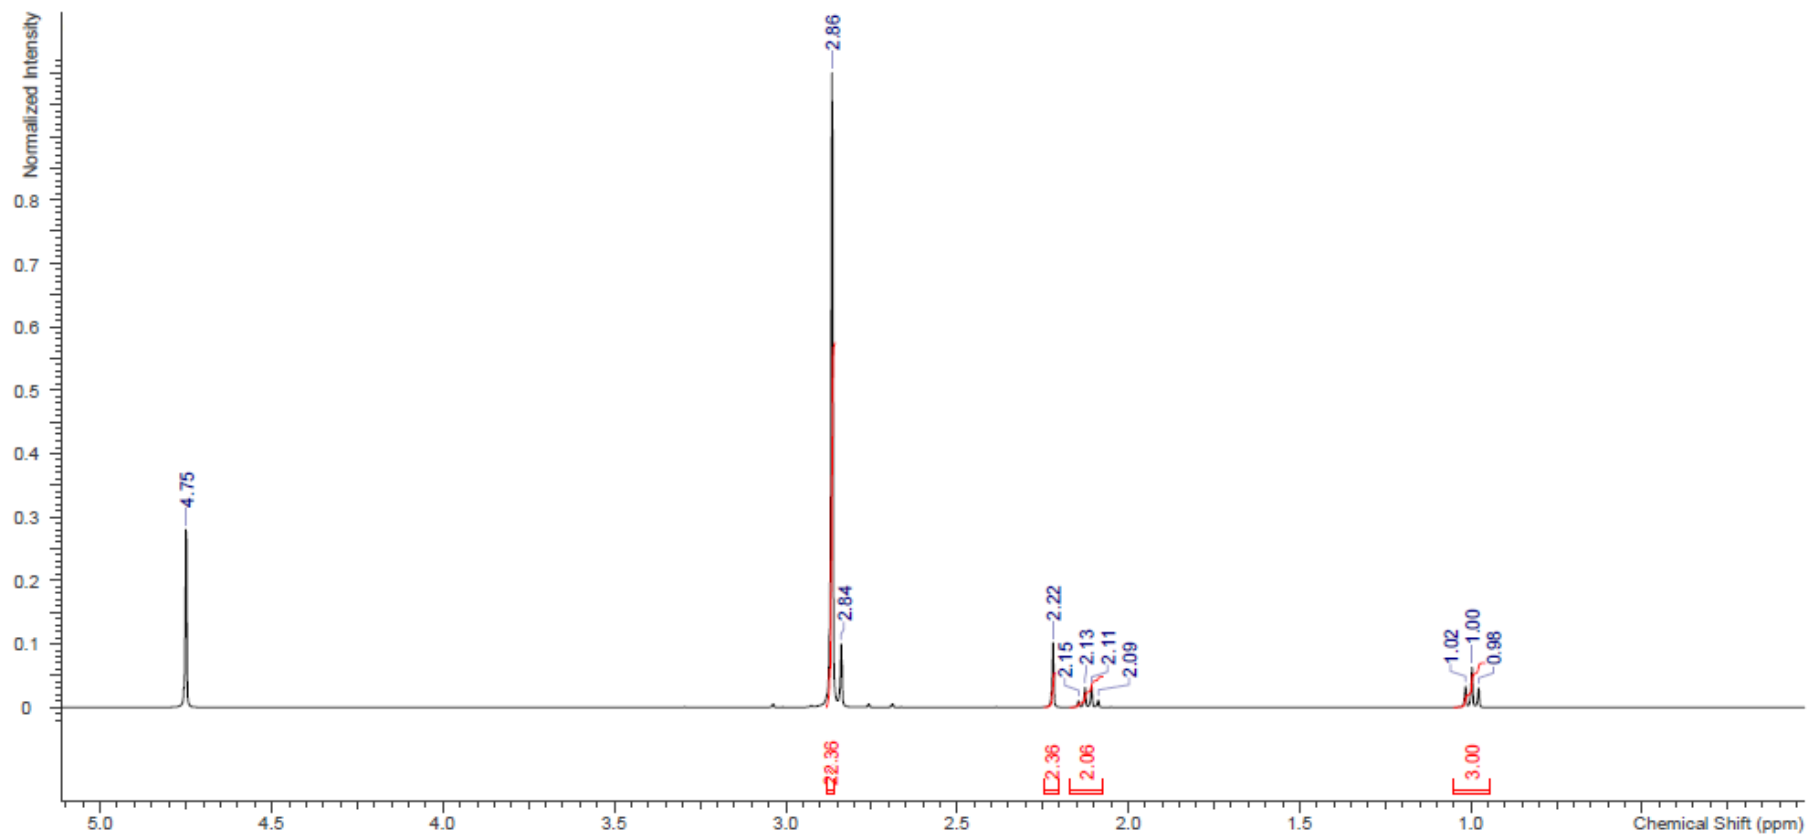

Fig S7: 65% TMG, before heating



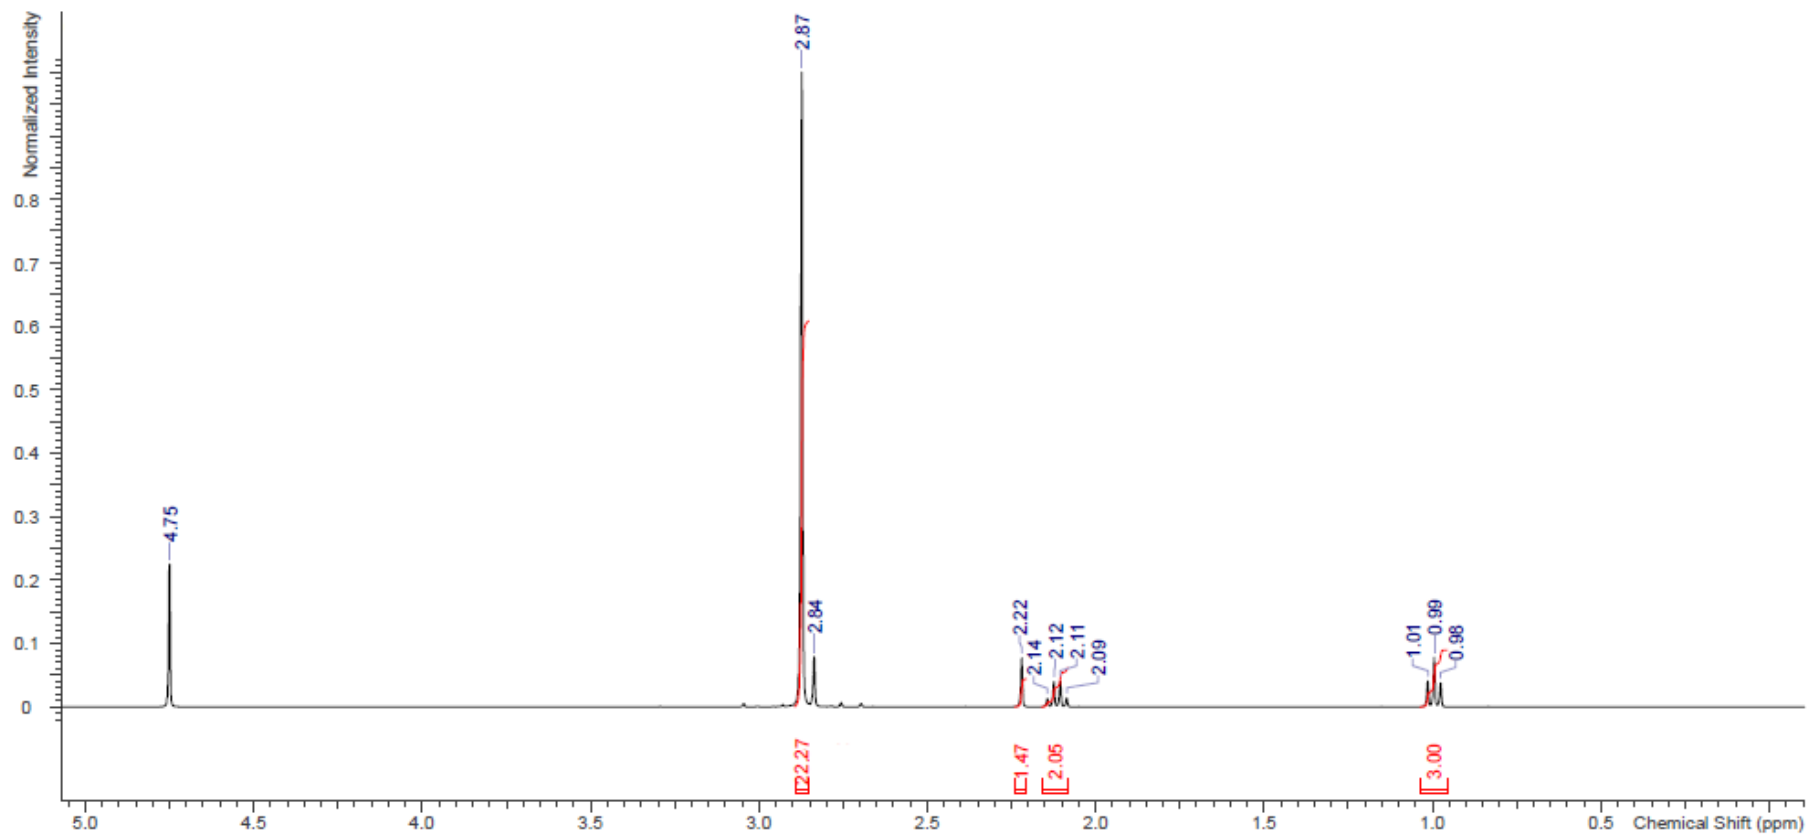

Fig S8: 65% TMG, after heating

# Thermogravimetric analysis data of regenerated cellulose samples

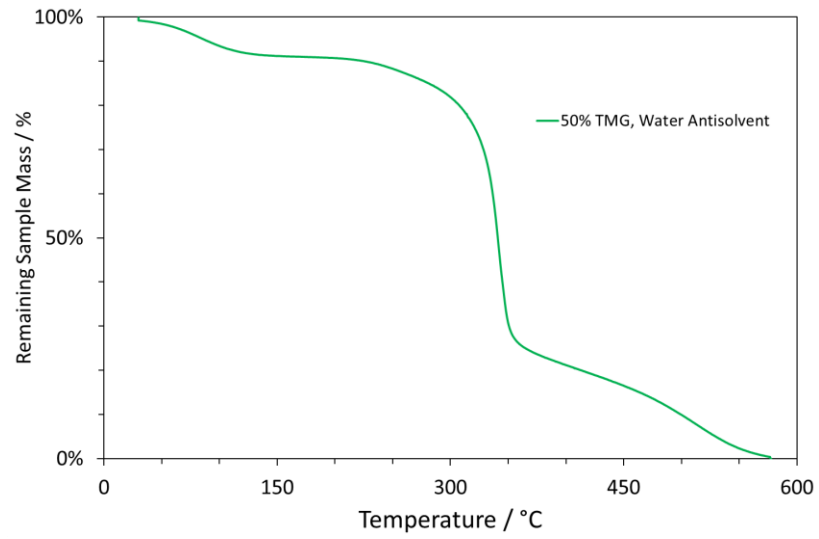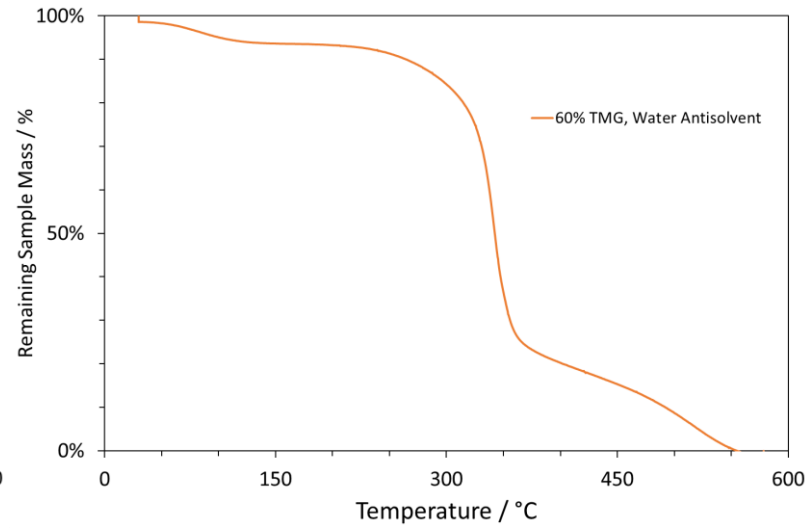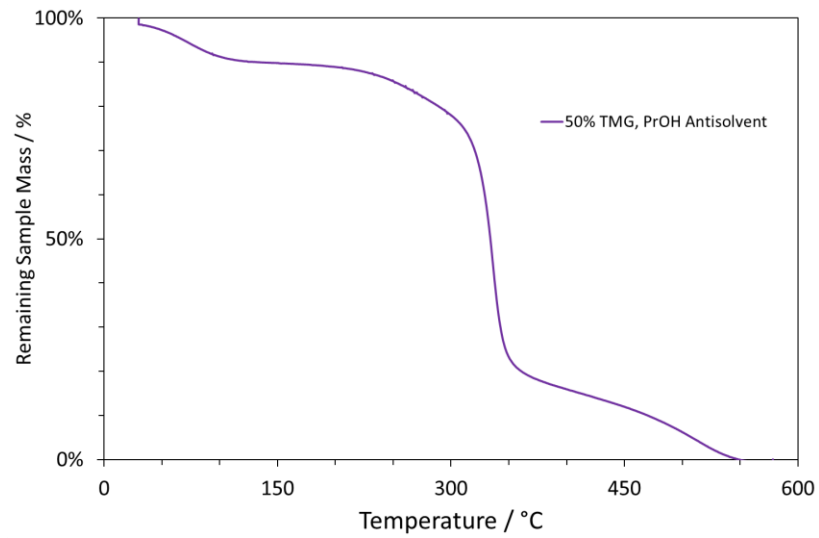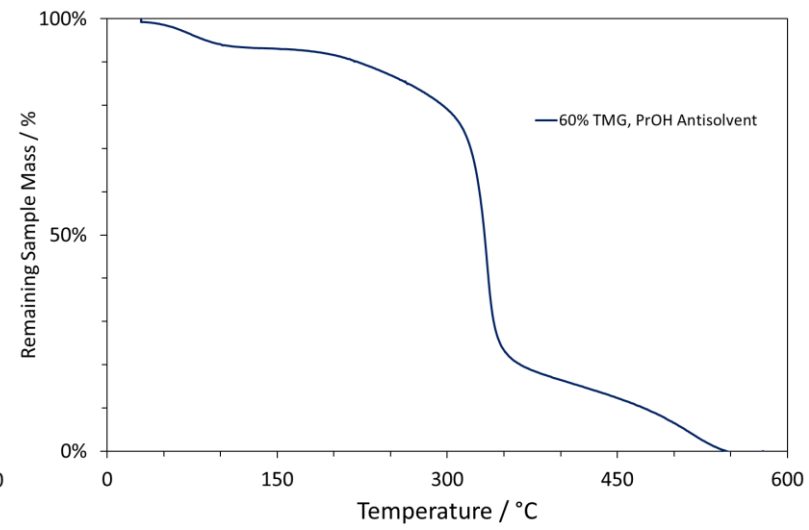

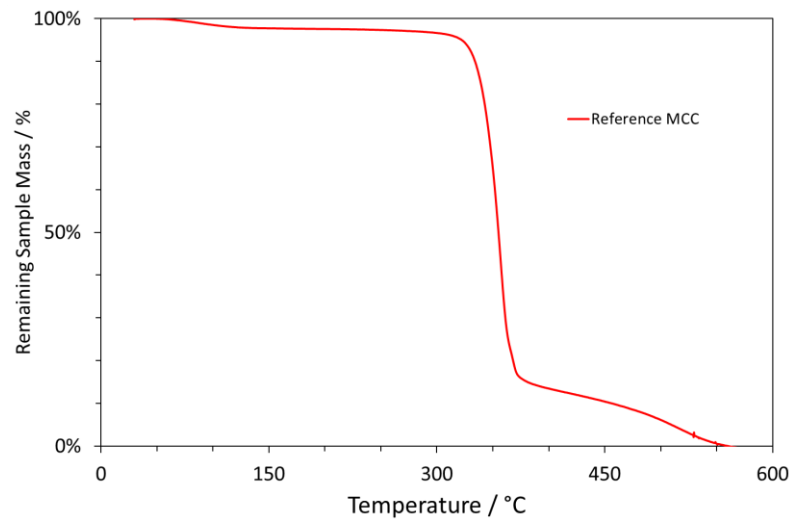

### Differential thermogram data of regenerated cellulose samples

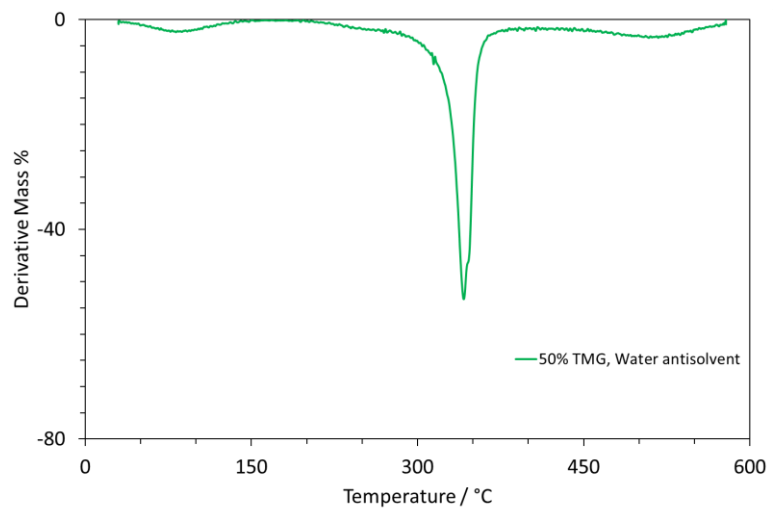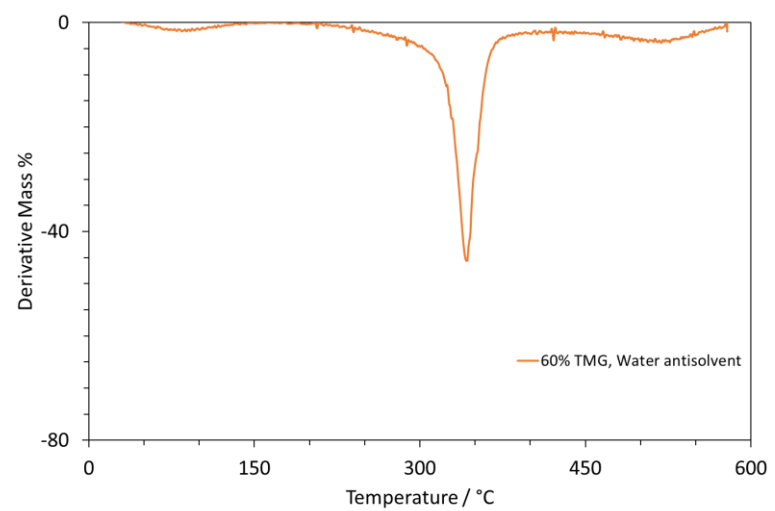

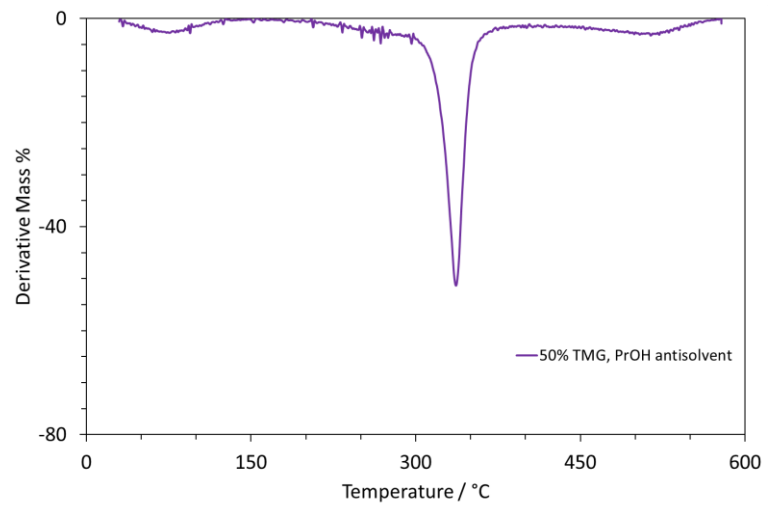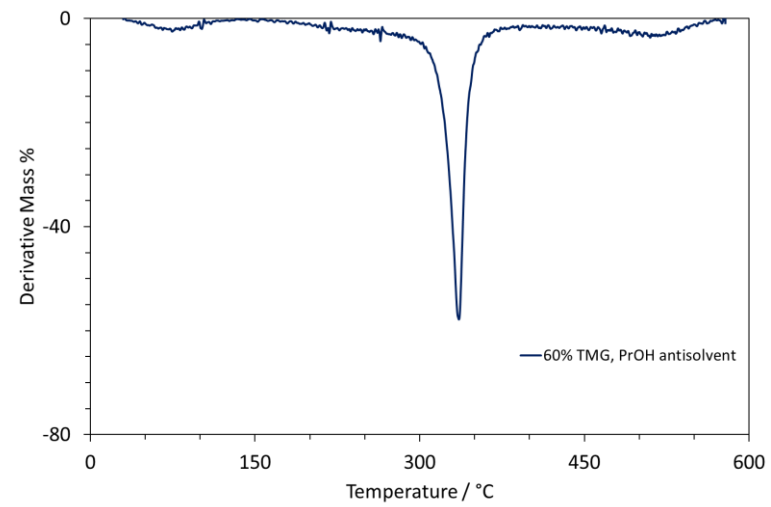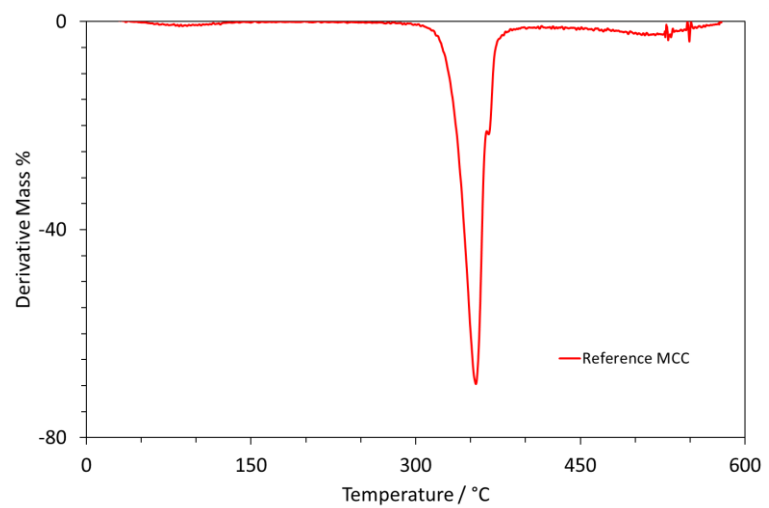

# Infrared spectroscopy data of regenerated cellulose samples

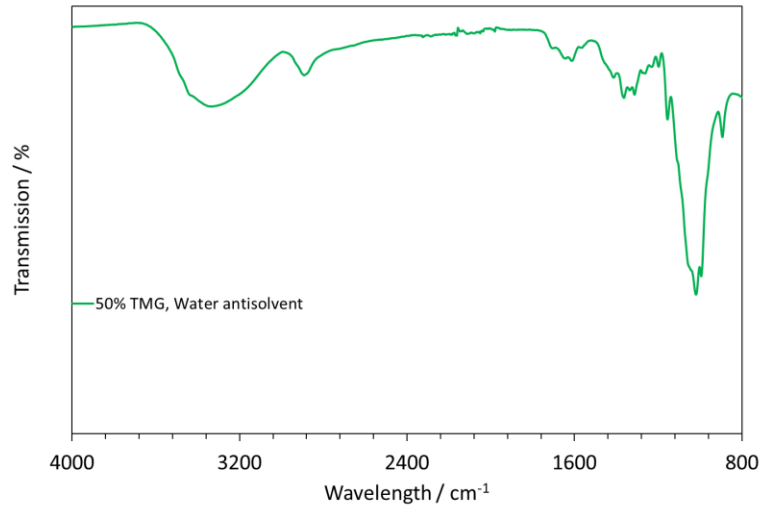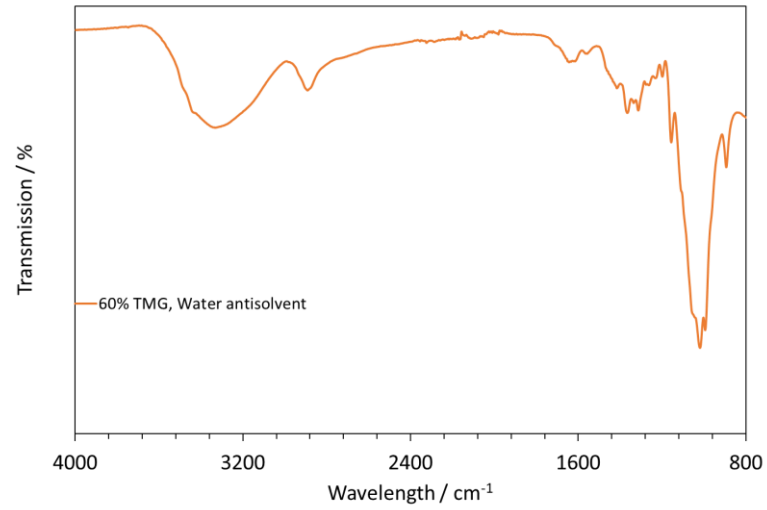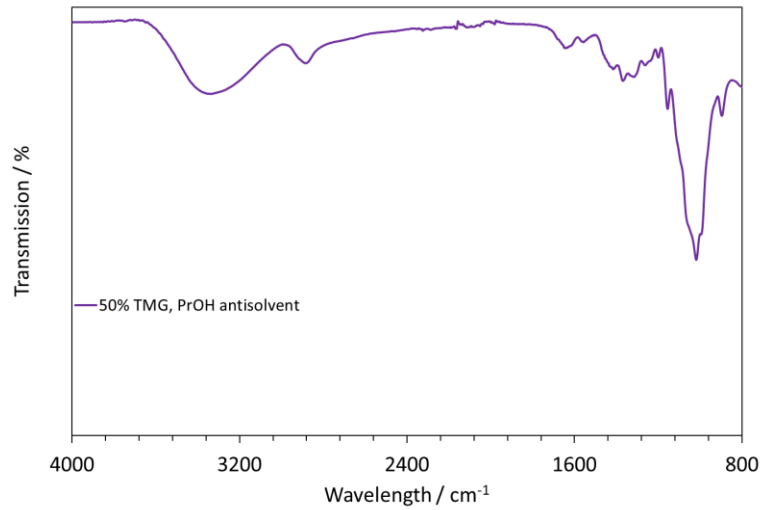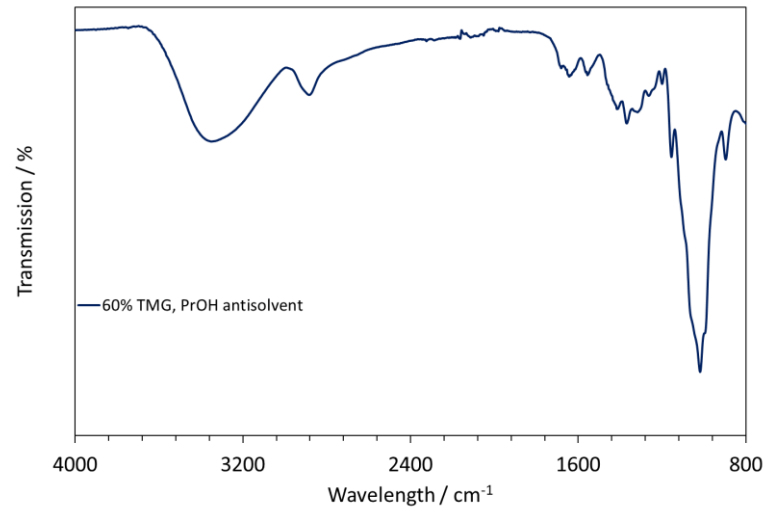

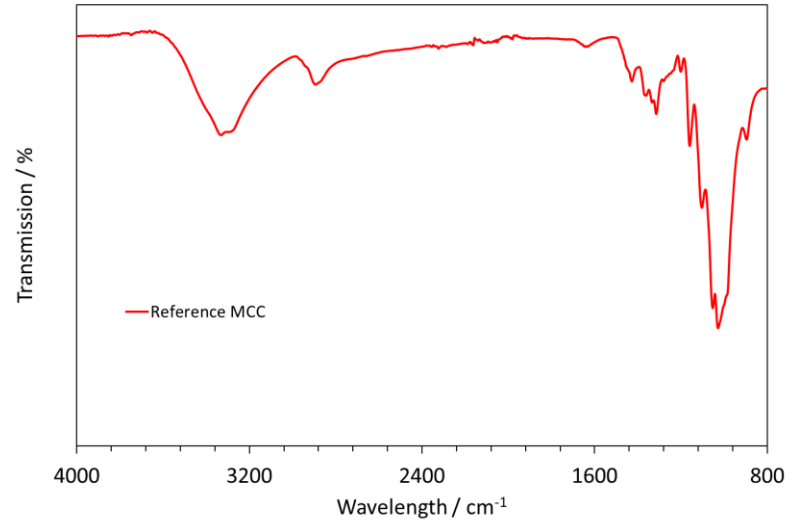

Supplement: MOESM1 [file 18374194]
